# Supplementary material for: Development of Water-Resistant Autohesive Strength of Polyethylene Plates with Photografting of Alkyl (Meth)Acrylates
Source: MDPI journal article supplement (doi:10.3390/macromol3030032), 2023-08-15
Supplement: s1 [file s1]

## Supplementary Materials

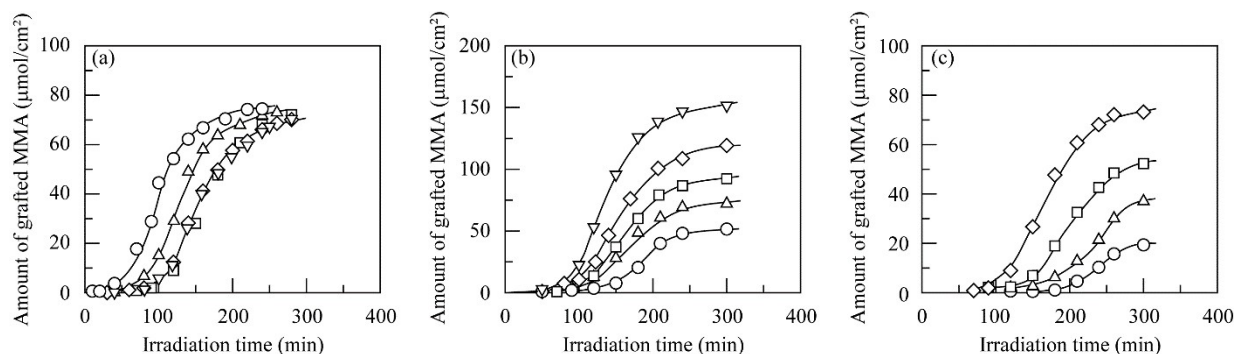

**Figure S1:** Changes in the amount of grafted MMA with the irradiation time for the photograftings (a) at the methanol concentration of the solvent of 50 (○), 60 (△), 70 (□), 80 (◇), and 90 (▽) vol% at 1.0 M and 60°C, (b) at the monomer concentration of 0.75 (○), 1.0 (△), 1.25 (□), 1.5 (◇), and 2.0 (▽) M in a 70 vol% aqueous methanol solution at 60°C, and (c) at the grafting temperature of 40 (○), 50 (△), 55 (□), and 60 (◇) °C in a 70 vol% aqueous methanol solution at 1.0 M.

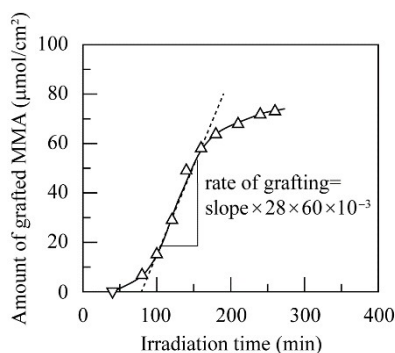

**Figure S2:** Determination of the rate of grafting under the steady conditions.

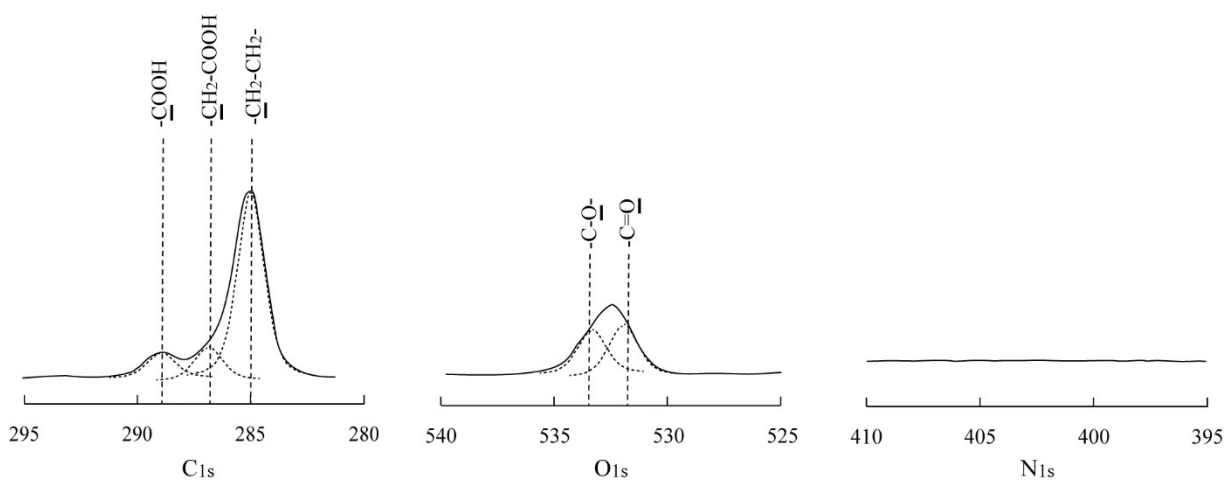

**Figure S3:** The high-resolution spectra of  $\text{C}_{1s}$ ,  $\text{O}_{1s}$ , and  $\text{N}_{1s}$  for the PE-g-PMMA plate
